# Supplementary material
Source: Springer Nature journal article supplement (https://www.springerprofessional.de/resource/supplementary/13638_2012_553_MOESM1_ESM.pdf/11897984)

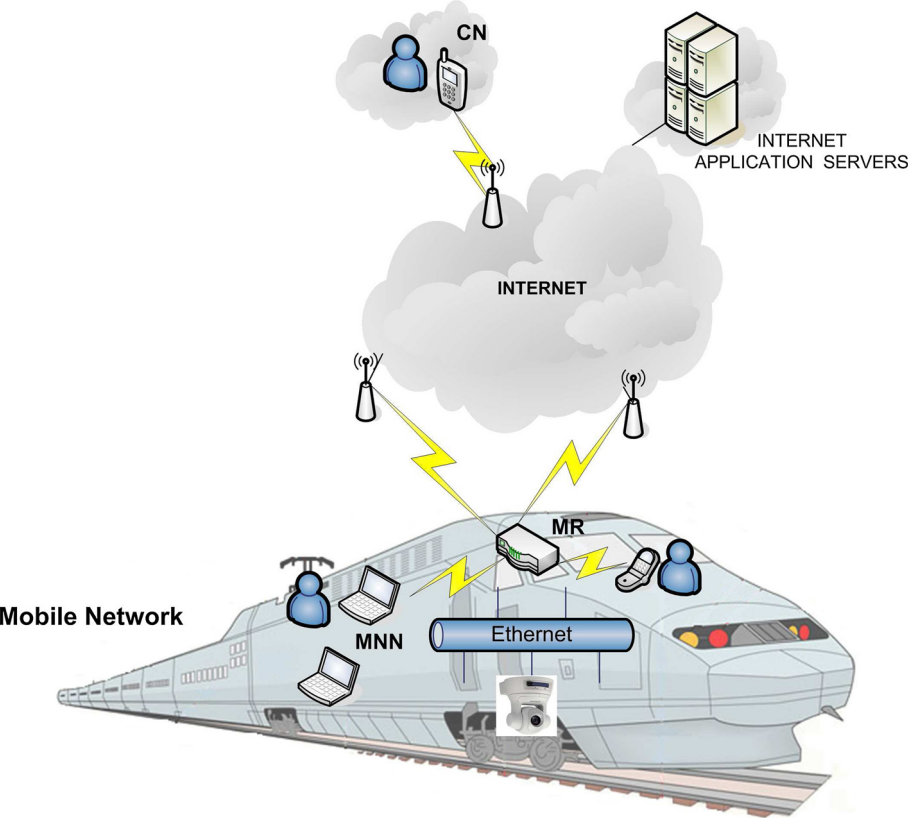

**MR: Mobile Router**  
**MNN: Mobile Network Node**  
**CN: Correspondent Node**

Supplement: MOESM1 [file 11897984]
